1 **BENEFIT-RISK ASSESSMENT OF COVID-19 VACCINE, MRNA (MRNA-1273)**  
2 **FOR MALES AGE 18-64 YEARS**

3

4 **Osman N. Yogurtcu<sup>a</sup>, Patrick R. Funk<sup>a</sup>, Richard A. Forshee<sup>a</sup>, Steven A. Anderson<sup>a</sup>, Peter W. Marks<sup>b,c</sup>,**  
5 **Hong Yang<sup>a\*</sup>**

6

7 <sup>a</sup>Office of Biostatistics and Pharmacovigilance, Center for Biologics Evaluation and Research, US FDA, Silver Spring, MD, USA

8 <sup>b</sup>Office of Vaccines Research and Review, Center for Biologics Evaluation and Research, USFDA, Silver Spring, MD, USA

9 <sup>c</sup>Office of the Center Director, Center for Biologics Evaluation and Research, US FDA, Silver Spring, MD, USA

10

11 **ABSTRACT**

12 Since authorization of the Moderna mRNA COVID-19 Vaccine, real-world evidence has indicated its  
13 effectiveness in preventing COVID-19 cases. However, increased cases of mRNA vaccine-associated  
14 myocarditis/pericarditis have been reported, predominantly in young adults and adolescents. The Food  
15 and Drug Administration conducted benefit-risk assessment to inform review of the Biologics License  
16 Application for use of the Moderna vaccine among individuals ages 18 years and older. We modeled  
17 benefit-risk per million individuals who receive two complete doses of the vaccine. Benefit endpoints  
18 were vaccine-preventable COVID-19 cases, hospitalizations, intensive care unit (ICU) admissions, and  
19 deaths. The risk endpoints were vaccine-related myocarditis/pericarditis cases, hospitalizations, ICU  
20 admissions and deaths. The analysis was conducted on the age-stratified male population, due to data  
21 signals and previous work showing males to be the main risk group. We constructed six scenarios to

1

22 evaluate the impact of uncertainty associated with pandemic dynamics, vaccine effectiveness (VE)  
23 against novel variants, and rates of vaccine-associated myocarditis/pericarditis cases on the model  
24 results. For our most likely scenario, we assumed the US COVID-19 incidence was for the week of  
25 December 25, 2021, and a VE of 30% against cases and 72% against hospitalization with the Omicron-  
26 dominant strain. Our source for estimating vaccine-attributable myocarditis/pericarditis rates was  
27 FDA's CBER Biologics Effectiveness and Safety (BEST) System databases. Overall, our results supported  
28 the conclusion that the benefits of the vaccine outweigh its risks. Remarkably, we predicted vaccinating  
29 one million 18-25 year-old males would prevent 82,484 cases, 4,766 hospitalizations, 1,144 ICU  
30 admissions, and 51 deaths due to COVID-19, comparing to 128 vaccine-attributable  
31 myocarditis/pericarditis cases, 110 hospitalizations, zero ICU admissions, and zero deaths.  
32 Uncertainties in the pandemic trajectory, effectiveness of vaccine against novel variants, and vaccine-  
33 attributable myocarditis/pericarditis rate are important limitations of our analysis. Also, the model  
34 does not evaluate potential long-term adverse effects due to either COVID-19 or vaccine-attributable  
35 myocarditis/pericarditis.

36 **Correspondence:** [Hong.Yang@fda.hhs.gov](mailto:Hong.Yang@fda.hhs.gov) (Office of Biostatistics & Pharmacovigilance, FDA - Center for  
37 Biologics Evaluation and Research, 10903 New Hampshire Ave, WO71, Silver Spring, MD 20993-0002  
38 USA)

39 **Keywords** COVID-19 Vaccine · FDA · Benefit-Risk Analysis · Males · Myocarditis · Pericarditis

40

41

## 42 1. Introduction

43 The Moderna COVID-19 mRNA (mRNA-1273) vaccine has been available for use in persons 18 years of  
44 age and older in the United States under Emergency Use Authorization (EUA) and was recently licensed  
45 in January 2022. Since authorization of mRNA COVID-19 vaccines (Pfizer-BioNTech and Moderna) in  
46 December of 2020, real-world evidence from the pre-Omicron period has indicated the vaccines  
47 effectively prevent COVID-19 cases, hospitalizations, and deaths. However, cases of myocarditis and  
48 pericarditis associated with mRNA COVID-19 vaccines have been reported in the United States (US),  
49 especially in adolescents (for whom the Pfizer-BioNTech vaccine is authorized) and young adult males<sup>1-3</sup>  
50 through the Biologics Effectiveness and Safety (BEST) system which is an active post-market  
51 surveillance system at the US Food and Drug Administration's (FDA) Center for Biologics Evaluation and  
52 Research (CBER). CBER follows FDA's structured framework<sup>16</sup> when making decisions on product  
53 licensure. FDA previously conducted and published a benefit-risk assessment for use of COMIRNATY  
54 among ages 16 years and older<sup>6</sup>. In this paper, to advance the transparency regarding FDA's decision-  
55 making process, we report its benefit-risk (B-R) assessment (using principles similar to FDA<sup>6</sup> and CDC's<sup>4</sup>  
56 earlier assessment for a different vaccine) to inform regulatory decisions related to the Biologics  
57 License Application (BLA) for use of the Moderna vaccine among individuals 18 years of age and older.

58 The regulatory question addressed by our analyses is whether the benefits of vaccination  
59 outweigh the risks for the target population, considering the uncertainties of the evolving pandemic  
60 (changes in disease incidence and emergence of new variants) and the risk of myocarditis/pericarditis  
61 after vaccination, predominantly among young males, identified by post-authorization safety  
62 surveillance. Our assessment used the structured benefit-risk framework (BRF) including four key  
63 dimensions - Analysis of Condition, Current Treatment Options, Benefits, and Risks and Risk  
64 Management<sup>5</sup>. We assessed the benefits and risks per million males ages 18-64 years who are

65 vaccinated with two complete doses of the Moderna vaccine. The metric is fixed at per one million  
66 individuals with two complete primary doses of vaccination) to compare benefits and risks consistently  
67 among the groups without knowing how vaccine uptake may vary. We estimated COVID-19 cases,  
68 hospitalizations, ICU admissions, and deaths prevented by the vaccination (benefits) and  
69 myocarditis/pericarditis cases, related hospitalizations, ICU admissions, and deaths attributable to the  
70 vaccine (risks). We chose these endpoints as they are the most clear and measurable endpoints for  
71 benefits and risks that have the greatest public health significance. Modeling was not conducted for  
72 females and individuals 65 years of age and older due to previous work showing a relative lower risk<sup>6</sup>  
73 among these groups, resulting in too few cases of myocarditis/pericarditis after vaccination in these  
74 groups to reliably estimate myocarditis/pericarditis rates. These groups are also expected to have more  
75 favorable benefit-risk compared to males age 18-64 years based on available evidence.

## 76 2. Methods

### 77 2.1. Model Overview

78 We used similar methodology as presented in our earlier paper<sup>6</sup>. Details of our calculation may be seen  
79 in our Microsoft Excel model file in the Supplementary. We assessed the benefits and risks per million  
80 male population stratified by age: 18-25, 26-35, 36-45, 46-55 and 56-64 years since data indicated an  
81 age-dependent risk of myocarditis and pericarditis post vaccination. Those age groups aligned with the  
82 data collection stratification for COVID-19 outcomes. The model benefit endpoints were vaccine-  
83 preventable COVID-19 cases, hospitalizations, intensive care unit (ICU) admissions, and deaths. The  
84 model risk endpoints were vaccine related myocarditis/pericarditis cases, hospitalizations, ICU  
85 admissions, and deaths (Figure 1). Key model inputs include duration of vaccine protection, VE against  
86 COVID-19 cases and hospitalizations, age-specific COVID-19 case and hospitalization incidence rates,

87 age-specific vaccine-attributable myocarditis case rate, hospitalizations, ICU admissions, and death  
88 rate.

89 Our model produced benefit-risk outcomes for six different scenarios (Table 1) as a sensitivity  
90 analysis of the uncertainties related to three major model inputs, COVID-19 incidence rate (Scenarios 1,  
91 2, and 3), VE (Scenarios 1 and 4), and vaccine-attributable myocarditis/pericarditis rate (Scenarios 1, 5,  
92 and 6). We decide to use Scenario 1 as a base scenario since it represents the most-up-to date COVID-  
93 19 incidence at the time of this analysis. For the remaining scenarios, only one of the three major  
94 model inputs from Scenario 1 is modified at a time (summarized in Table 1). Model predictions are  
95 provided in Table 2. Visual benefit-risk plot for age groups 18-25, 26-35, and 36-45 for Scenario 1 is  
96 shown on Figure 2.

## 97 2.2. Benefits

### 98 2.2.1. Data and assumptions

#### 99 2.2.1.1. Duration of vaccine protection

100 We estimated protection over a 5-month period after completion of the 2-dose primary series, since a  
101 5-month interval between completion of the primary series and booster dose is authorized by FDA and  
102 recommended by the Centers for Disease Control and Prevention (CDC). For simplicity, the model did  
103 not account for benefits of partial vaccination and assumes a constant VE during the 5-month period  
104 post second dose. We did not factor in protection from potential exposure or infection with COVID-19  
105 among unvaccinated individuals into our analysis since the degree of this protection and its time-  
106 dependency were not well understood at the time of analysis.

#### 107 2.2.1.2. Incidences of COVID-19 case, hospitalization, ICU, and death

108 The COVID-19 case and hospitalization incidence rates were assumed to remain constant over the

109 assessment period (within 5 months post-second dose). For Scenarios 1, 4, 5, and 6, the crude  
110 incidence rates of COVID-19 cases and deaths in the unvaccinated population from the week of  
111 December 25, 2021, were obtained from the COVID Data Tracker for all male age groups<sup>8</sup>. The  
112 hospitalization rates for these scenarios were for the week of December 25, 2021, collected by COVID-  
113 NET<sup>7</sup>. The percentage of hospitalizations with ICU admission was estimated based on the cumulative  
114 rates of ICU admissions for each male age group from March 2020 to October 2021 provided by the  
115 CDC (collected by COVID-NET). We used the average 2021 US COVID-19 incidence rate and the lowest  
116 US COVID-19 incidence rate (June 2021) in Scenarios 2 and 3, respectively. All the incidence-related  
117 model inputs are summarized in Table 3.

### 118 2.2.1.3. Vaccine effectiveness

119 We assumed Omicron as the dominant strain in Scenarios 1, 2, 3, 5, and 6 and assumed averages of  
120 30% VE against COVID-19 cases and 72% VE against COVID-19 hospitalizations during the 5-month  
121 period post second dose. The data from a UK surveillance report were used to derive these VEs for  
122 Omicron<sup>9</sup>. For Scenario 4 we assume Delta as the dominant strain and used the US averages of 80% VE  
123 against cases and 90% VE against hospitalizations<sup>10</sup>. Many studies conducted in the US and other  
124 countries during the Delta-dominant period showed consistently high VE of the Moderna vaccine  
125 against both COVID-19 cases and related hospitalization<sup>10,11</sup>. For all scenarios, we assumed the vaccine  
126 effectiveness against death due to COVID-19 would be equal to the vaccine effectiveness against  
127 hospitalizations due to COVID-19.

## 128 2.3. Risks

### 129 2.3.1. Calculation of risks

130 Our benefit-risk model had four risk endpoints (Figure 1): vaccine-attributable myocarditis/pericarditis

131 cases, hospitalizations, ICU admissions, and deaths. Estimates of vaccine-attributable cases of  
132 myocarditis/pericarditis (per 1 million person-days with a risk window of 7 days post vaccination) were  
133 based on a meta-analysis of four health claims databases in BEST, which combined data from four data  
134 partners (DP) starting from December 10, 2020 (Table 4). Data cutoff dates for the sources were as  
135 follows: DP1 (August 21, 2021), DP2 (July 10, 2021), DP3 (July 31, 2021), and DP4 (June 30, 2021). The  
136 age-specific vaccine-attributable incidences of myocarditis/pericarditis were calculated for dose 2 and  
137 used as the model input for the risk of individuals with complete two dose vaccination. The risk post  
138 dose 1 was ignored since CDC has suggested people who have myocarditis after dose 1 to have a  
139 precaution to receive dose 2, and the majority the myocarditis cases were reported post dose 2. For  
140 Scenarios 1, 2, 3, and 4 we used the mean meta-analysis predicted myocarditis/pericarditis rate for  
141 each male age group, while for Scenario 5 we use the 2.5<sup>th</sup> percentile rate and for Scenario 6 we used  
142 the 97.5<sup>th</sup> percentile rate. We used Equation 1 to calculate total myocarditis/pericarditis ( $M_{Pred}$ ) per one  
143 million individuals who completed primary vaccination series (two doses of vaccine).

144

|                            |       |
|----------------------------|-------|
| $M_{Pred} = M_{Pred2} * F$ | Eq. 1 |
|----------------------------|-------|

145

146  $M_{Pred2}$  is the meta-analysis estimated myocarditis/pericarditis case rates post dose 2. As presented  
147 previously<sup>6</sup>, these rates given in units of per 100k person-years were divided by 365 days and multiplied  
148 by 7 days (the risk window), which derives the total number of myocarditis/pericarditis cases within a  
149 7-days risk window among the 100k people who completed their primary vaccination series. Next, we  
150 multiplied that number by 10 and derived the total number of cases among one million individuals who  
151 completed their primary vaccination series. Consequently, when converting from 100k person-years to  
152 one million vaccinated individuals' risk post vaccination (in a 7-day risk window), the rates were

153 multiplied by a factor  $F = (7*10)/365$  as seen in Equation 1. We calculated the confidence intervals for  
154 the myocarditis cases with the chi-square method for Poisson distribution of rare events<sup>12</sup>. The number  
155 of myocarditis hospitalization ( $M_H$ ), ICU visits ( $M_{ICU}$ ), and deaths ( $M_D$ ) are fractions of predicted  
156 myocarditis/pericarditis cases ( $M_{Pred}$ ), such that  $M_H = M_{Pred} * F_H$ ,  $M_{ICU} = M_{Pred} * F_{ICU}$ , and  $M_D = M_{Pred} * F_D$   
157 where the scalars  $F_H$ ,  $F_{ICU}$ , and  $F_D$  here are fractions of myocarditis cases that result in the more severe  
158 outcomes: hospitalizations, ICU visits, and deaths, respectively.

### 159 2.3.2. Data and assumptions

#### 160 2.3.2.1. Myocarditis/pericarditis attributable to vaccine

161 We used myocarditis/pericarditis incidence data for male age groups derived from four BEST health  
162 claim databases (Table 4). **Meta-analysis results are available for the incidence of myocarditis case rates**  
163 **within the risk window of 7 days by vaccine dose 1 and 2 separately.** We limited this study to males 18-  
164 64 because the reported cases of myocarditis/pericarditis attributable to vaccine among female age  
165 groups and male and female age 65 years or above are very rare, leading to unstable estimates of case  
166 rates. Therefore, we are not able to provide reliable estimates of the risks for females in all age groups  
167 and individuals 65 years of age and above. Previous work on other mRNA vaccines has shown that the  
168 risks are lower for females and those over 65<sup>15</sup>.

#### 169 2.3.2.2. Myocarditis/pericarditis hospitalization and death rate

170 Vaccine Safety Datalink (VSD, a vaccine safety monitoring partnership between the CDC and 9  
171 integrated healthcare organizations) data<sup>13</sup> showed that 86% of myocarditis cases are hospitalized, and  
172 none required admission to the ICU for ages 18-29 years. The rate for hospitalization fell to 77% for  
173 ages 30-39 years. Since the age ranges in VSD differ from those in our analysis, we made the following  
174 adjustment for our age ranges. We used hospitalization rates of 86% for ages 18-25 years, 81.5% (the  
175 midpoint between ages 18-29 years and ages 30-39 years in VSD data) for ages 26-35 years, and 77%



176 for ages 36 years and above in our analysis. The hospitalizations were mainly for monitoring patients'  
177 condition as a precaution and no additional treatment is needed. Vaccine Safety Datalink (VSD) data  
178 show a median of a one-day stay during hospitalization<sup>13</sup>. No death confirmed to be caused by vaccine-  
179 attributable myocarditis/pericarditis has been identified. In this model, we used zero-death rate for  
180 vaccine attributable myocarditis/pericarditis as a model input.

### 181 3. Results

182 For Scenario 1 (base scenario), the model predicted that vaccination of 1 million males 18-25 years of  
183 age with two primary series doses of the vaccine would prevent 82,484 COVID-19 cases, 4,766  
184 hospitalizations, 1,144 ICU admissions and 51 deaths due to COVID-19, while causing 128 vaccine-  
185 attributable myocarditis/pericarditis cases, 110 hospitalizations and no ICU admissions. No death due  
186 to vaccine attributed myocarditis/pericarditis is expected. These results represented the benefit-risk of  
187 the groups with the highest potential myocarditis/pericarditis risk under the current scenario (Omicron  
188 dominant, most recent peak incidence, and the mean rate of vaccine-attributable  
189 myocarditis/pericarditis case), and we considered that the benefits of vaccine clearly outweigh the  
190 risks. The results for all six model scenarios are summarized in Table 2, and we considered that the  
191 benefits of vaccine clearly outweigh the risks for each of the additional 5 scenarios as well. Scenarios 1,  
192 2, and 3 represented the uncertainty in the case incidence (the week of December 25, 2021, average  
193 and the lowest incidence) in the future of the pandemic, Scenarios 1 and 4 represented the uncertainty  
194 in VE against the emerging variants (Omicron vs Delta), and Scenarios 1, 5, and 6 represented the  
195 uncertainty in the incidence rate of vaccine-attributable myocarditis/pericarditis.

### 196 4. Conclusions and Discussion

197 Based on available data, our results support the conclusion that the benefits of the Moderna vaccine

198 clearly outweigh its risks for all the model scenarios for all males 18-64 years of age. Furthermore,  
199 based on consistent evidence that indicates a lower risk of vaccine-associated myocarditis in females of  
200 all ages and in males 65 years and older, it is reasonable to expect that the benefit-risk balance of  
201 vaccination with Moderna in these demographic groups would be even more favorable compared with  
202 males 18-64 years of age. Therefore, we concluded the benefits of the Moderna vaccine outweigh its  
203 risks for the overall target population.

204 Our modeling approach has a few limitations in the estimation of benefits. In this analysis, we  
205 conducted sensitivity analyses to test the impact of the COVID-19 incidence rates at the recent peak,  
206 average, and lowest incidence level of the pandemic. Nevertheless, given the uncertain trajectory of  
207 the pandemic, our constant COVID-19 incidence rate assumption creates high uncertainty on the  
208 benefit estimates. Furthermore, the percentage of hospitalizations resulting in ICU admission and the  
209 percentage of hospitalized patients who die are estimated based on cumulative rates of  
210 hospitalizations, ICU admissions, and deaths for each age group reported on COVID-NET from March  
211 2020 to October 2021 (pre-Omicron period). The COVID-19 incidence rate might have changed since  
212 Omicron surged, but the more recent data were not yet available at the time of this analysis. The rate  
213 of ICU admission and death associated with Omicron may be lower compared to Delta, which may lead  
214 to overestimation of the benefits.

215 Also, estimated benefits of the vaccine would decrease if the vaccine became less effective against  
216 emerging SARS-CoV-2 variants. In this analysis, we evaluated the impact of different VEs for Omicron  
217 and Delta strains. However, there is uncertainty associated with future new variants or composition of  
218 the variants. Furthermore, the 30% VE for Omicron used in this analysis was obtained from a UK study.  
219 A similar US study with a smaller sample size showed an approximately 23% VE for Omicron within a 5-  
220 month period post second dose<sup>14</sup>. However, we do not expect that this difference in VE estimates  
221 would change our B-R conclusion. Another uncertainty for the model is vaccine protection durability. In

222 this analysis, we assumed a 5-month protection period after completion of two primary doses of the  
223 vaccine overall. If vaccine-induced immunity significantly wanes within five months post second dose,  
224 potentially differentially for infection versus serious disease, that may reduce the benefit of the  
225 vaccine. Another limitation to the benefits is that we do not factor in the potential for a COVID-19  
226 infection to impart additional protection. Antibody seroprevalence and its correlation to protection are  
227 not well understood yet. This could lead to an overestimation of the benefits of the vaccine. We  
228 assumed that the vaccine effectiveness against death would be equal to the vaccine effectiveness  
229 against COVID-19 hospitalizations in all scenarios. This could lead to underestimation of the benefits.

230 Our approach in estimating risks has limitations as well. First, neither the female group nor age 65  
231 years or older of both sexes were included in this analysis due to the rarity of cases of  
232 myocarditis/pericarditis in these populations leading to an unstable estimate of case rate. However,  
233 the B-R for females and individuals 65 years of age or older is expected to be more favorable compared  
234 to male age 18-65 years, for whom clear favorable benefit-risk was demonstrated by this analysis.  
235 Second, there is uncertainty in the risk of myocarditis cases attributable to the vaccine. To estimate  
236 myocarditis/pericarditis risk attributable to the vaccine, health claims data were used, which have  
237 inherent limitations such as small sample sizes due to rare events among age groups. The reported  
238 cases in BEST had not been validated by a complete review of the patients' medical charts, and  
239 therefore may be an overestimate. To address some of these limitations, the crude myocarditis rate in  
240 our model was adjusted using the myocarditis background rate in 2019 (measured by the BEST data  
241 partners), meta-analysis of four claims databases was conducted to increase the sample size, and a  
242 sensitivity analysis was conducted to test the impact on the benefit-risk of confidence interval of the  
243 estimated vaccine-attributable myocarditis/pericarditis case rate. Also, we use VSD data to calculate  
244 the rates of hospitalization and death associated with vaccine-attributable myocarditis/pericarditis.  
245 However, the actual rates we used for myocarditis came from the FDA's BEST system, not VSD. The

246 reason for this was that the VSD did not provide an age/sex specific myocarditis/pericarditis rate, and  
247 the young male group was our primary concern for the mRNA-based vaccine review. The BEST system,  
248 on the other hand, lacked information on hospitalizations and deaths caused by vaccine-attributable  
249 myocarditis and pericarditis. We did not estimate the proportions' accuracy, which is especially  
250 important because the rates of myocarditis for VSD and BEST can differ.

251 Furthermore, some benefit-risk endpoints in our assessment are difficult to compare directly, for  
252 example, hospitalizations from COVID-19 and myocarditis hospitalizations. Our B-R assessment did not  
253 include potential long-term adverse effects due to either COVID-19 or myocarditis and second-order  
254 benefits and risks including potential impact on the public trust in COVID-19 vaccines. In this analysis,  
255 we did not investigate the benefits and risks for specific subpopulations, such as those with  
256 comorbidities, due to limited information for these populations. Health condition of individuals may  
257 remarkably impact the B-R profile and its evaluation.

258 Our model and analyses helped inform FDA's licensure decision on Moderna's vaccine. FDA  
259 considered the impact of COVID-19 pandemic on the public health, unavailability of treatment options,  
260 urgent need for a vaccine to prevent the disease and control the pandemic, together with available  
261 evidence and uncertainty associated with vaccine effectiveness and vaccine-attributable  
262 myocarditis/pericarditis risk. The FDA Review Committee agreed that the benefit/risk balance for the  
263 vaccine was favorable and supported approval for use of a 2-dose primary series in individuals 18 years  
264 of age and older<sup>17</sup>. The purpose for publication of this benefit-risk assessment is to increase the  
265 transparency of our regulatory action, communicating to the public that benefits of vaccination with  
266 the Moderna COVID-19 Vaccine clearly outweigh the risks even among the male adolescent population  
267 that is at a higher risk of myocarditis/pericarditis. This will hopefully increase public confidence in the  
268 vaccine and promote vaccination to fight COVID-19.

## 269 5. Acknowledgements

270 We thank Christian Reed, Ph.D., Rituparna Moitra, Ph.D., and Rosser Matthews, Ph.D. for editing this  
271 manuscript. We thank Joyce Obidi, Ph.D., and Hui-Lee Wong, Ph.D. for helpful discussions. We thank,  
272 Diane Gubernot, Ph.D. and Marisabel Rodriguez Messan, Ph.D. for reviewing the manuscript. We thank  
273 FDA CBER OBPV data and analysis partners ACUMEN and OPTUM. Also, we thank the Centers for  
274 Disease Control and Prevention, particularly the Vaccine Task Force, for sharing initial benefit-risk  
275 assessment model and data on COVID-19 pandemic.

## 276 Conflict of Interest Statement

277 The authors declare that they have no conflicts of interest relevant to the manuscript submitted to  
278 VACCINE X. We confirm that all authors attest they meet the ICMJE criteria for authorship.

## 279 References

- 280 1. Marshall M, et al. Symptomatic acute myocarditis in seven adolescents following Pfizer-  
281 BioNTech COVID-19 vaccination. *Pediatrics*. 2021;2. <https://doi.org/10.1542/peds.2021-052478>.
- 282 2. Shay DK, Tom T. Shimabukuro, and Frank DeStefano. Myocarditis occurring after immunization  
283 with mRNA-based COVID-19 vaccines. *JAMA cardiology*. 2021.  
284 <https://doi.org/10.1001/jamacardio.2021.2821>.
- 285 3. Watkins K, et al. Myocarditis after BNT162b2 vaccination in a healthy male. *The American*  
286 *Journal of Emergency Medicine*. 2021. <https://doi.org/10.1016/j.ajem.2021.06.051>.
- 287 4. Centers for Disease Control and Prevention. Population-Level Risk-Benefit Analysis. *5 May*  
288 *2021*, <https://www.cdc.gov/vaccines/covid-19/info-by-product/janssen/risk-benefit-analysis.html>.  
289 2021.
- 290 5. US Food and Drug Administration, “Structured Approach to Benefit-Risk Assessment in Drug  
291 Regulatory Decision-Making” available at <https://www.fda.gov/media/84831/download>.
- 292 6. Funk, PR, et al. Benefit-Risk Assessment of COVID-19 Vaccine, mRNA (Comirnaty) for Age 16-29  
293 years. *Vaccine*. <https://doi.org/10.1016/j.vaccine.2022.03.030>, 2022.
- 294 7. COVID-NET. A weekly summary of U.S. COVID-19 Hospitalization Data – Laboratory-Confirmed  
295 COVID-19 Associated Hospitalizations. *Retrieved December 31, 2021, from*  
296 [https://gis.cdc.gov/grasp/COVIDNet/COVID19\\_3.html](https://gis.cdc.gov/grasp/COVIDNet/COVID19_3.html). 2021.
- 297 8. COVID Data Tracker. COVID-19 Weekly Cases and Deaths per 100,000 Population by Age,  
298 Race/Ethnicity, and Sex. *Retrieved December 31, 2021, from* [https://covid.cdc.gov/covid-data-](https://covid.cdc.gov/covid-data-tracker/#demographicvertime)  
299 [tracker/#demographicvertime](https://covid.cdc.gov/covid-data-tracker/#demographicvertime). 2021.

- 300 9. UKHSA (UK Health Security Agency). December 31. SARS-CoV-2 variants of concern and variants  
301 under investigation in England Technical briefing: Update on hospitalization and vaccine effectiveness  
302 for Omicron VOC-21NOV-01 (B.1.1.529). Retrieved December 31, 2021, from  
303 [https://assets.publishing.service.gov.uk/government/uploads/system/uploads/attachment\\_data/file/1](https://assets.publishing.service.gov.uk/government/uploads/system/uploads/attachment_data/file/1045619/Technical-Briefing-31-Dec-2021-Omicron_severity_update.pdf)  
304 [045619/Technical-Briefing-31-Dec-2021-Omicron\\_severity\\_update.pdf](https://assets.publishing.service.gov.uk/government/uploads/system/uploads/attachment_data/file/1045619/Technical-Briefing-31-Dec-2021-Omicron_severity_update.pdf). 2021.
- 305 10. Jones J. COVID-19 Vaccine Effectiveness for Moderna and Janssen Vaccines. ACIP meeting  
306 October 21, 2021, Retrieved December 17, 2021, from  
307 [https://www.cdc.gov/vaccines/acip/meetings/downloads/slides-2021-10-20-21/10-COVID-jones-](https://www.cdc.gov/vaccines/acip/meetings/downloads/slides-2021-10-20-21/10-COVID-jones-508.pdf)  
308 [508.pdf](https://www.cdc.gov/vaccines/acip/meetings/downloads/slides-2021-10-20-21/10-COVID-jones-508.pdf). 2021.
- 309 11. Oliver S. Updates to the Evidence to Recommendation Framework: Pfizer-BioNTech and  
310 Moderna COVID-19 vaccine booster doses. retrieved on November 22, 2021, from  
311 <https://www.cdc.gov/vaccines/acip/meetings/downloads/slides-2021-11-19/06-COVID-Oliver-508.pdf>  
312 2021.
- 313 12. Garwood F-. Fiducial limits for the Poisson distribution. *Biometrika* 1936;28.3/4:437-42.
- 314 13. Klein N. Rapid Cycle Analysis to Monitor the Safety of COVID-19 Vaccines in Near Real-Time  
315 within the Vaccine Safety Datalink: Myocarditis and Anaphylaxis. ACIP Meeting August 30, 2021,  
316 Retrieved February 4, 2022 from [https://www.cdc.gov/vaccines/acip/meetings/downloads/slides-](https://www.cdc.gov/vaccines/acip/meetings/downloads/slides-2021-08-30/04-COVID-Klein-508.pdf)  
317 [2021-08-30/04-COVID-Klein-508.pdf](https://www.cdc.gov/vaccines/acip/meetings/downloads/slides-2021-08-30/04-COVID-Klein-508.pdf).
- 318 14. Tseng, H.F., Ackerson, B.K., Luo, Y. et al. Effectiveness of mRNA-1273 against SARS-CoV-2  
319 Omicron and Delta variants. *Nat Med* (2022). <https://doi.org/10.1038/s41591-022-01753-y>
- 320 15. Rosenblum, H., COVID-19 Vaccines in Adults: Benefit-Risk Discussion, ACIP Presentation July 22,  
321 2021. Retrieved from [https://www.cdc.gov/vaccines/acip/meetings/downloads/slides-2021-07/05-](https://www.cdc.gov/vaccines/acip/meetings/downloads/slides-2021-07/05-COVID-Rosenblum-508.pdf)  
322 [COVID-Rosenblum-508.pdf](https://www.cdc.gov/vaccines/acip/meetings/downloads/slides-2021-07/05-COVID-Rosenblum-508.pdf).
- 323 16. US FDA Guidance. Benefit-Risk Assessment for New Drug and Biological Products 2021. Available  
324 from: [https://www.fda.gov/regulatory-information/search-fda-guidance-documents/benefit-risk-](https://www.fda.gov/regulatory-information/search-fda-guidance-documents/benefit-risk-assessment-new-drug-and-biological-products)  
325 [assessment-new-drug-and-biological-products](https://www.fda.gov/regulatory-information/search-fda-guidance-documents/benefit-risk-assessment-new-drug-and-biological-products).
- 326 17. US FDA, Summary Basis for Regulatory Action for Spikevax. Available from  
327 <https://www.fda.gov/media/155931/download>  
328

329 **Table 1. Six model scenarios with varying COVID-19 incidence rates, vaccine effectiveness against cases and**  
 330 **hospitalization, and myocarditis/pericarditis rates.**

|                   | <b>COVID-19 Incidence</b>                         | <b>Vaccine Effectiveness</b>                                                               | <b>Excess Myocarditis Risk</b>                      |
|-------------------|---------------------------------------------------|--------------------------------------------------------------------------------------------|-----------------------------------------------------|
| <b>Scenario 1</b> | As of December, 2021                              | Omicron dominant:<br>30% against cases<br>72% against hospitalization<br>72% against death | Mean of BEST meta-analysis                          |
| <b>Scenario 2</b> | Average COVID-19 pandemic incidence in 2021       | Same as Scenario 1                                                                         | Same as Scenario 1                                  |
| <b>Scenario 3</b> | Lowest COVID-19 pandemic incidence (June 5, 2021) | Same as Scenario 1                                                                         | Same as Scenario 1                                  |
| <b>Scenario 4</b> | Same as Scenario 1                                | Delta dominant:<br>80% against cases<br>90% against hospitalization<br>90% against death   | Same as Scenario 1                                  |
| <b>Scenario 5</b> | Same as Scenario 1                                | Same as Scenario 1                                                                         | 2.5 <sup>th</sup> percentile of BEST meta-analysis  |
| <b>Scenario 6</b> | Same as Scenario 1                                | Same as Scenario 1                                                                         | 97.5 <sup>th</sup> percentile of BEST meta-analysis |

331

332

333 **Table 2. Benefit-risk outcomes per million males vaccinated with 2 primary series doses of Moderna CVmRNA**  
 334 **under each of six scenarios described in Table 1.**

|            | Ages    | BENEFITS |                  |       |        | RISKS    |                  |          |          |
|------------|---------|----------|------------------|-------|--------|----------|------------------|----------|----------|
|            |         | COVID    | COVID            | COVID | COVID  | Myo/Peri | Myo/Peri         | Myo/Peri | Myo/Peri |
|            |         | Cases    | Hospitalizations | ICUs  | Deaths | Cases    | Hospitalizations | ICUs     | Deaths   |
| Scenario 1 | 18-25yo | 82,484   | 4,766            | 1,144 | 51     | 128      | 110              | 0        | 0        |
|            | 26-35yo | 87,557   | 4,766            | 1,220 | 247    | 32       | 26               | 0        | 0        |
|            | 36-45yo | 90,939   | 4,766            | 1,258 | 378    | 23       | 18               | 0        | 0        |
|            | 46-55yo | 77,624   | 10,921           | 3,200 | 1,423  | 13       | 10               | 0        | 0        |
|            | 56-64yo | 68,747   | 15,025           | 4,928 | 2,120  | 10       | 7                | 0        | 0        |
| Scenario 2 | 18-25yo | 26,705   | 2,088            | 501   | 48     | 128      | 110              | 0        | 0        |
|            | 26-35yo | 29,718   | 2,088            | 535   | 235    | 32       | 26               | 0        | 0        |
|            | 36-45yo | 31,727   | 2,088            | 551   | 359    | 23       | 18               | 0        | 0        |
|            | 46-55yo | 29,174   | 4,607            | 1,350 | 1,087  | 13       | 10               | 0        | 0        |
|            | 56-64yo | 27,472   | 6,286            | 2,062 | 1,573  | 10       | 7                | 0        | 0        |
| Scenario 3 | 18-25yo | 3,903    | 635              | 152   | 7      | 128      | 110              | 0        | 0        |
|            | 26-35yo | 4,307    | 635              | 163   | 33     | 32       | 26               | 0        | 0        |
|            | 36-45yo | 4,576    | 635              | 168   | 50     | 23       | 18               | 0        | 0        |
|            | 46-55yo | 4,311    | 1,127            | 330   | 158    | 13       | 10               | 0        | 0        |
|            | 56-64yo | 4,134    | 1,456            | 477   | 230    | 10       | 7                | 0        | 0        |
| Scenario 4 | 18-25yo | 219,958  | 5,957            | 1,430 | 63     | 128      | 110              | 0        | 0        |
|            | 26-35yo | 233,486  | 5,957            | 1,525 | 309    | 32       | 26               | 0        | 0        |
|            | 36-45yo | 242,504  | 5,957            | 1,573 | 472    | 23       | 18               | 0        | 0        |
|            | 46-55yo | 206,998  | 13,652           | 4,000 | 1,779  | 13       | 10               | 0        | 0        |
|            | 56-64yo | 183,326  | 18,781           | 6,160 | 2,650  | 10       | 7                | 0        | 0        |
| Scenario 5 | 18-25yo | 82,484   | 4,766            | 1,144 | 51     | 68       | 58               | 0        | 0        |
|            | 26-35yo | 87,557   | 4,766            | 1,220 | 247    | 9        | 7                | 0        | 0        |
|            | 36-45yo | 90,939   | 4,766            | 1,258 | 378    | 11       | 9                | 0        | 0        |
|            | 46-55yo | 77,624   | 10,921           | 3,200 | 1,423  | 7        | 5                | 0        | 0        |
|            | 56-64yo | 68,747   | 15,025           | 4,928 | 2,120  | 4        | 3                | 0        | 0        |
| Scenario 6 | 18-25yo | 82,484   | 4,766            | 1,144 | 51     | 241      | 207              | 0        | 0        |
|            | 26-35yo | 87,557   | 4,766            | 1,220 | 247    | 119      | 97               | 0        | 0        |
|            | 36-45yo | 90,939   | 4,766            | 1,258 | 378    | 47       | 36               | 0        | 0        |
|            | 46-55yo | 77,624   | 10,921           | 3,200 | 1,423  | 23       | 18               | 0        | 0        |
|            | 56-64yo | 68,747   | 15,025           | 4,928 | 2,120  | 23       | 18               | 0        | 0        |

335

336



337 **Table 3. End of December 2021 US COVID incidences in the unvaccinated population listed by age groups (Male**  
338 **population only) and percentage of hospitalized going to ICU. Source: 1- COVID Data Tracker, 2-COVID-NET.**

| <b>Age group</b> | <b>Daily COVID-19 cases/100k persons<sup>1</sup></b> | <b>Daily Hospitalizations/100k persons<sup>2</sup></b> | <b>Daily deaths/100k persons<sup>1</sup></b> | <b>Percent of hospitalized going to ICU<sup>2</sup></b> |
|------------------|------------------------------------------------------|--------------------------------------------------------|----------------------------------------------|---------------------------------------------------------|
| 18-25            | 180.89                                               | 4.35                                                   | 0.05                                         | 24.0                                                    |
| 26-35            | 192.01                                               | 4.35                                                   | 0.23                                         | 25.6                                                    |
| 36-45            | 199.43                                               | 4.35                                                   | 0.34                                         | 26.4                                                    |
| 46-55            | 170.23                                               | 9.98                                                   | 1.30                                         | 29.3                                                    |
| 56-64            | 150.76                                               | 13.73                                                  | 1.94                                         | 32.8                                                    |

339

340

341 **Table 4. Estimated rates of vaccine-attributable myocarditis/pericarditis cases post second dose of the primary**  
342 **series, by age subgroup, for 1 million fully vaccinated male individuals with Moderna CVmRNA.**

| <b>Age Group</b> | <b>Moderna CVmRNA<br/>Adjusted Rate per 1M Doses<br/>Point Estimate and 95% CI</b> | <b>Data Source</b><br>(DP = CBER BEST Data Partner) |
|------------------|------------------------------------------------------------------------------------|-----------------------------------------------------|
| <b>18-25</b>     | 127.8 [67.8, 241.2]                                                                | <b>DP1-4</b>                                        |
| <b>26-35</b>     | 31.8 [8.5, 118.9]                                                                  | <b>DP1-4</b>                                        |
| <b>36-45</b>     | 23.1 [11.3, 47.2]                                                                  | <b>DP1-4</b>                                        |
| <b>46-55</b>     | 12.5 [6.9, 22.8]                                                                   | <b>DP1-4</b>                                        |
| <b>56-64</b>     | 9.6 [3.9, 23.3]                                                                    | <b>DP1-4</b>                                        |

343

344

345

346 Figure Captions

347 Figure 1. Benefits-risks value tree.

348 Description: A tree from left to right pointing out the benefits and risks of Moderna CVmRNA.

349 Figure 2. Benefit-risk outcomes per million males in age groups within 18-45 years for scenario 1

350 Description: Six bar graphs examining benefits (e.g., prevented deaths) and risks (e.g., excess  
351 deaths)

352

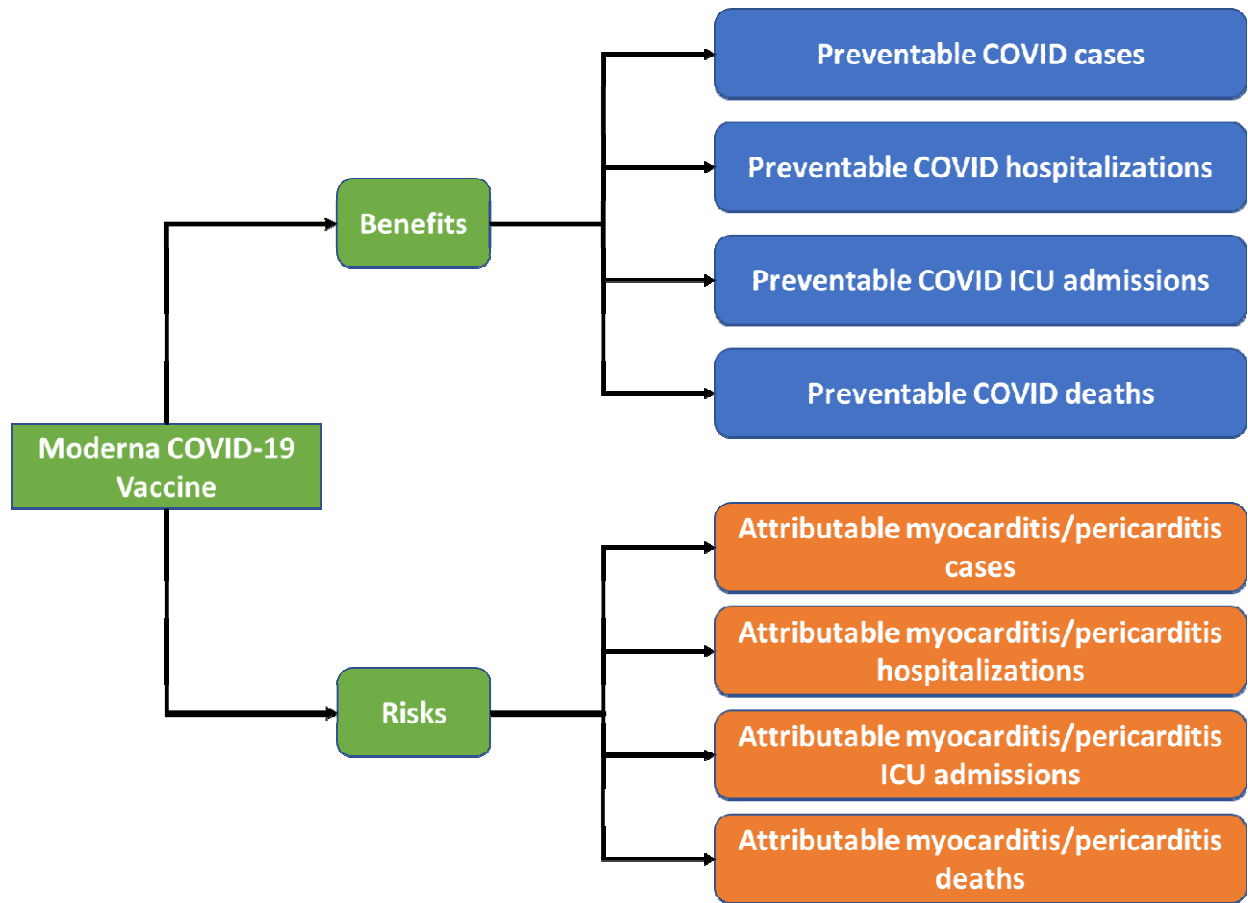

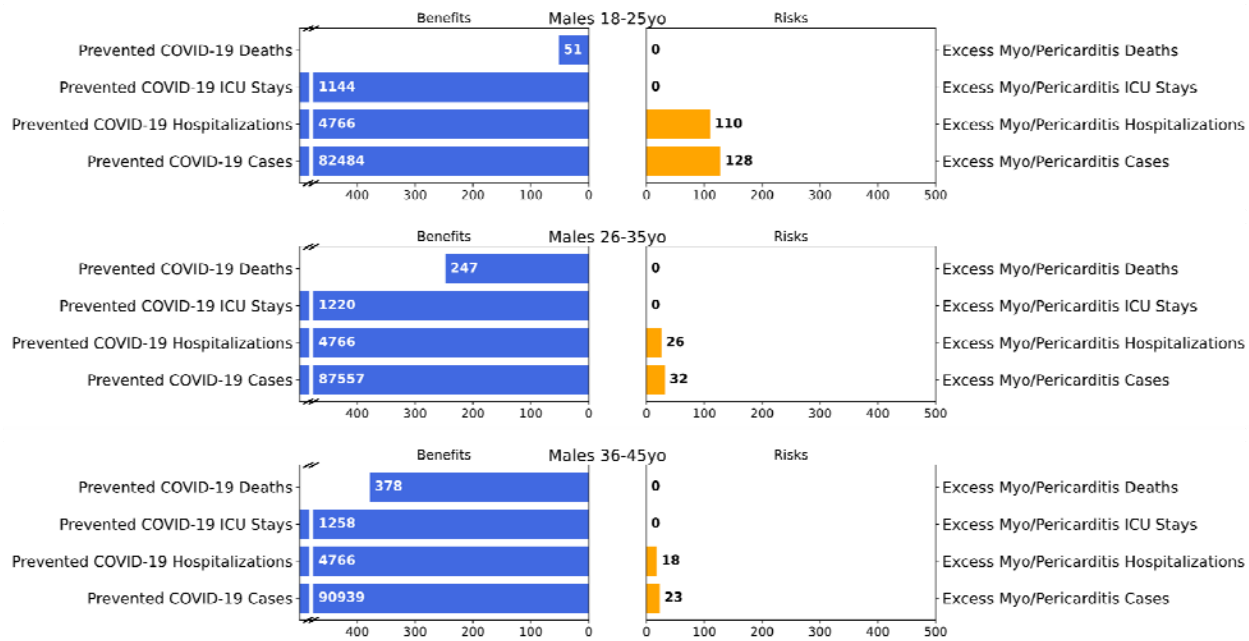

Source: https://medrxiv.org/content/10.1101/2022.12.02.22283050v1.full.pdf
